# Supplementary material for: Land-use and land-cover change carbon emissions between 1901 and 2012 constrained by biomass observations
Source: Copernicus journal article supplement (doi:10.5194/bg-2017-186), 2017-06-02
Supplement: Supplementary file 1 [file bg-2017-186-supplement.pdf]

Supporting Information for

**Land-use and land-cover change carbon emissions between 1901 and 2012 constrained by biomass observations**

Wei Li<sup>1</sup>, Philippe Ciais<sup>1</sup>, Shushi Peng<sup>1,2</sup>, Chao Yue<sup>1</sup>, Yilong Wang<sup>1</sup>, Martin Thurner<sup>3</sup>, Sassan S. Saatchi<sup>4</sup>, Almut Arneth<sup>5</sup>, Valerio Avitabile<sup>6</sup>, Nuno Carvalhais<sup>7,8</sup>, Anna B. Harper<sup>9</sup>, Etsushi Kato<sup>10</sup>, Charles Koven<sup>11</sup>, Yi Y. Liu<sup>12</sup>, Julia E.M.S. Nabel<sup>13</sup>, Yude Pan<sup>14</sup>, Julia Pongratz<sup>13</sup>, Benjamin Poulter<sup>15</sup>, Thomas A. M. Pugh<sup>5,16</sup>, Maurizio Santoro<sup>17</sup>, Stephen Sitch<sup>18</sup>, Benjamin D. Stocker<sup>19,20</sup>, Nicolas Viovy<sup>1</sup>, Andy Wiltshire<sup>21</sup>, Rasoul Yousefpour<sup>13,‡</sup>, Sönke Zaehle<sup>7</sup>

<sup>1</sup>Laboratoire des Sciences du Climat et de l'Environnement, LSCE/IPSL, CEA-CNRS-UVSQ, Université Paris-Saclay, F-91191 Gif-sur-Yvette, France

<sup>2</sup>Sino-French Institute for Earth System Science, College of Urban and Environmental Sciences, Peking University, Beijing 100871, China

<sup>3</sup>Department of Environmental Science and Analytical Chemistry (ACES) and the Bolin Centre for Climate Research, Stockholm University, SE-106 91 Stockholm, Sweden

<sup>4</sup>Jet Propulsion Laboratory, California Institute of Technology, 4800 Oak Grove Drive, Pasadena, CA 91109, USA

<sup>5</sup>Karlsruhe Institute of Technology, Institute of Meteorology and Climate Research - Atmospheric Environmental Research (IMK-IFU), Garmisch-Partenkirchen, Germany

<sup>6</sup>Centre for Geo-Information and Remote Sensing, Wageningen University & Research, Droevendaalsesteeg 3, 6708PB Wageningen, The Netherlands

<sup>7</sup>Department for Biogeochemical Integration, Max-Planck-Institute for Biogeochemistry, Jena, Germany

<sup>8</sup>CENSE, Departamento de Ciências e Engenharia do Ambiente, Faculdade de Ciências e Tecnologia, Universidade NOVA de Lisboa, Caparica, Portugal

<sup>9</sup>College of Engineering, Mathematics, and Physical Sciences, University of Exeter, Exeter, UK

<sup>10</sup>Institute of Applied Energy, Minato, Tokyo 105-0003, Japan

<sup>11</sup>Climate and Ecosystem Sciences Department, Lawrence Berkeley Lab, Berkeley, CA, USA

<sup>12</sup>ARC Centre of Excellence for Climate Systems Science & Climate Change Research Centre, University of New South Wales, Sydney, New South Wales 2052, Australia

<sup>13</sup>Max Planck Institute for Meteorology, Hamburg, Germany

<sup>14</sup>USDA Forest Service, Durham, New Hampshire, USA

<sup>15</sup>Department of Ecology, Montana State University, Bozeman, MT 59717

<sup>16</sup>School of Geography, Earth & Environmental Science and Birmingham Institute of Forest Research, University of Birmingham, Birmingham, B15 2TT, United Kingdom

<sup>17</sup>GAMMA Remote Sensing, 3073 G ümligen, Switzerland

<sup>18</sup>College of Life and Environmental Sciences, University of Exeter, Exeter, UK

<sup>19</sup>Climate and Environmental Physics, and Oeschger Centre for Climate Change Research, University of Bern, Bern, Switzerland

<sup>20</sup>Imperial College London, Life Science Department, Silwood Park, Ascot, Berkshire SL5 7PY, UK

<sup>21</sup>Met Office Hadley Centre, Exeter, Devon. EX1 3PB, UK

<sup>‡</sup>Current address: Chair of Forestry Economics and Forest Planning, University of Freiburg, 79106 Freiburg, Germany

Corresponding author: Wei Li (wei.li@lsce.ipsl.fr)

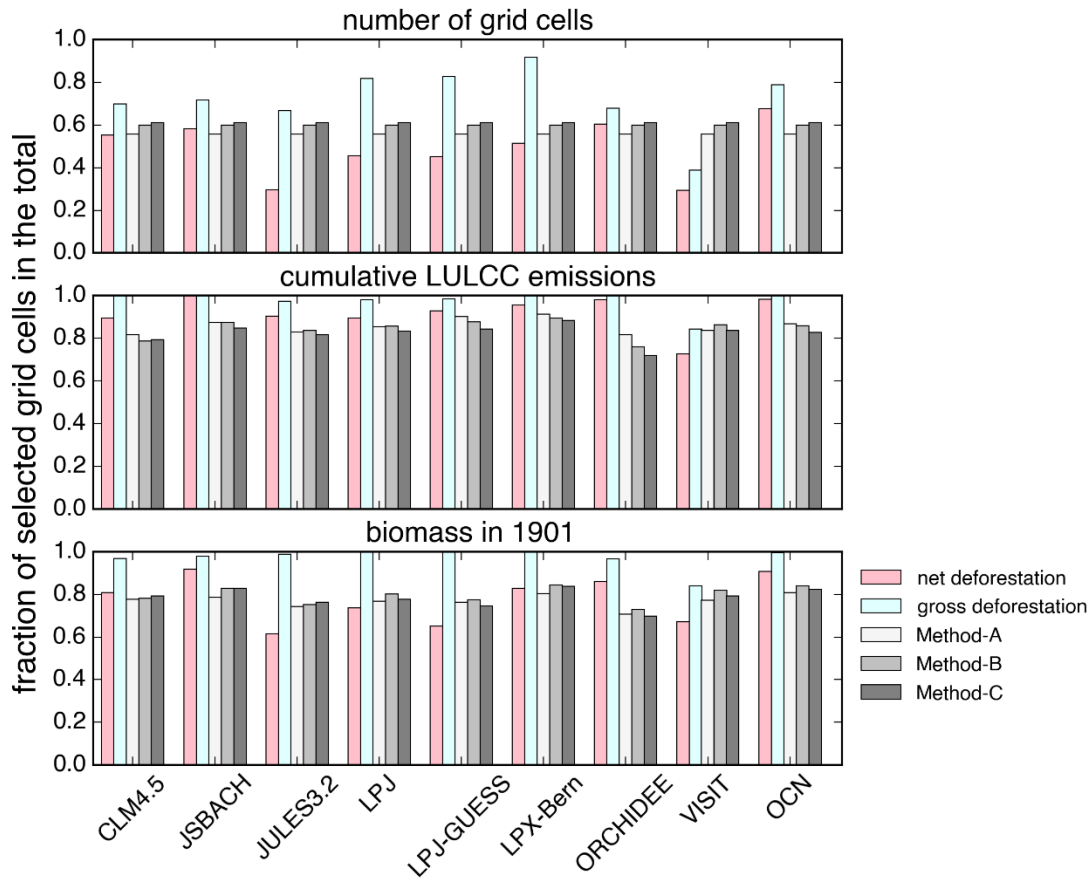

**Figure S1.** The percentage of the total number of grid cells, the total cumulative land-use and land-cover change (LULCC) emissions and the total biomass amount in 1901 that the deforestation grid cells account for in each model using different methods to define deforestation grid cells. Net deforestation refers to comparing vegetation cover maps between the year 1901 and the year 2012 for each DGVM and selecting the deforestation grid cells; gross deforestation represents comparing vegetation maps year-by-year during 1901 and 2012 and selecting the deforestation grid cells; Method-A, Method-B and Method-C represent selecting deforestation grid cells by assuming the increase of cropland in HYDE v3.1 data from forest, all the increase of cropland and pasture in HYDE v3.1 data proportionally from other natural vegetation types, and backward extrapolated map based on HYDE v3.1 data and meanwhile constrained by regional deforestation data, respectively.

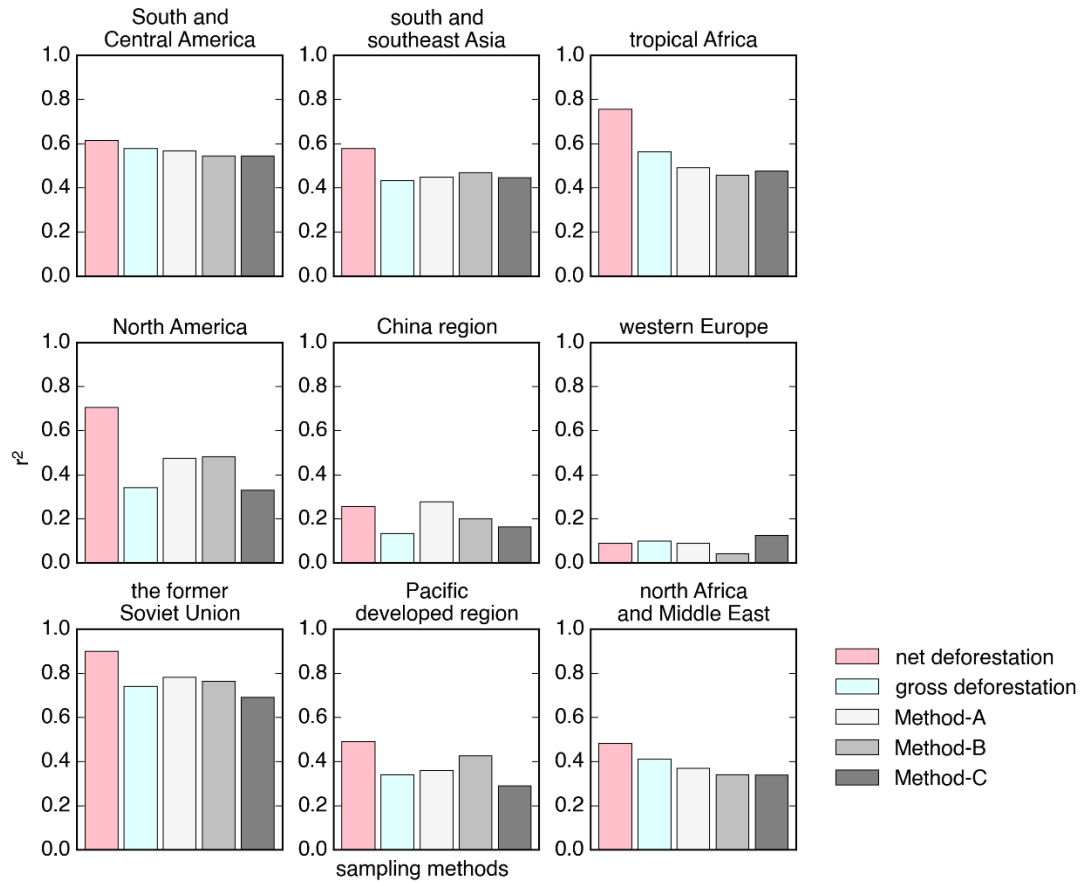

**Figure S2.** The coefficient of determination ( $r^2$ ) of the regression between biomass in 1901 and cumulative land-use and land-cover change (LULCC) emissions during 1901-2012 across the nine TRENDY models using different methods to define deforestation grid cells. Net deforestation refers to comparing vegetation cover maps between the year 1901 and the year 2012 for each DGVM and selecting the deforestation grid cells; gross deforestation represents comparing vegetation maps year-by-year during 1901 and 2012 and selecting the deforestation grid cells; Method-A, Method-B and Method-C represent selecting deforestation grid cells by assuming the increase of cropland in HYDE v3.1 data from forest, all the increase of cropland and pasture in HYDE v3.1 data proportionally from other natural vegetation types, and backward extrapolated map based on HYDE v3.1 data and meanwhile constrained by regional deforestation data, respectively.

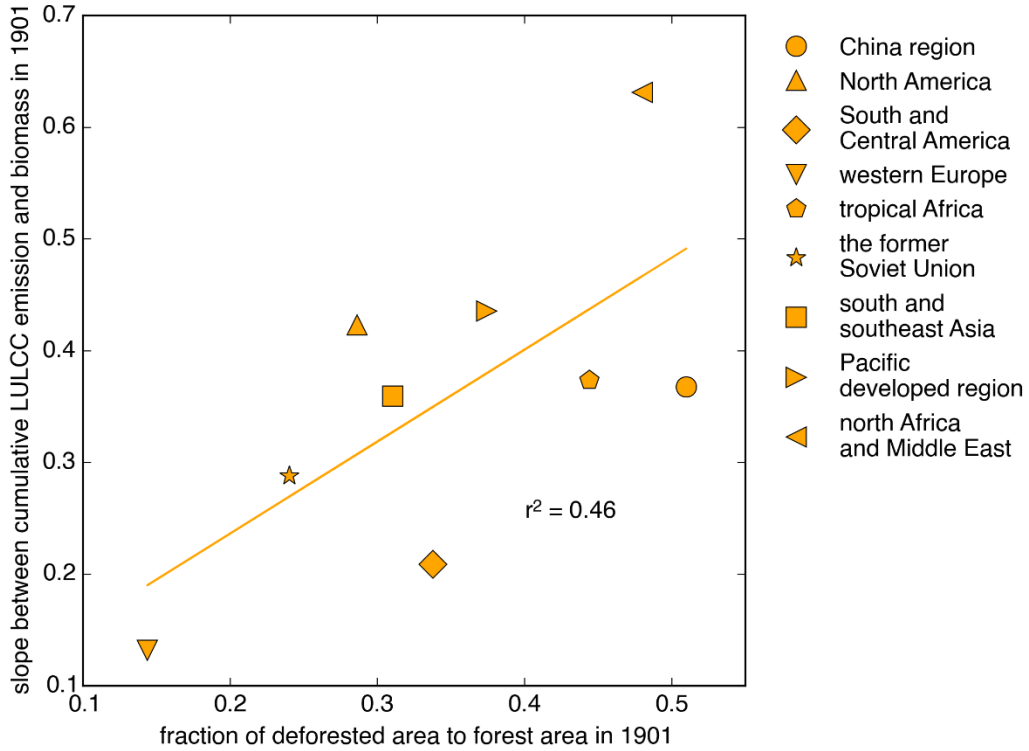

**Figure S3.** The relationship between the fraction of deforested area to forest area in 1901 (median value across the nine models) and the slopes of cumulative land-use and land-cover change (LULCC) emissions during 1901-2012 against biomass in 1901 from TRENDY models (the slopes of black solid lines in Figure 2).

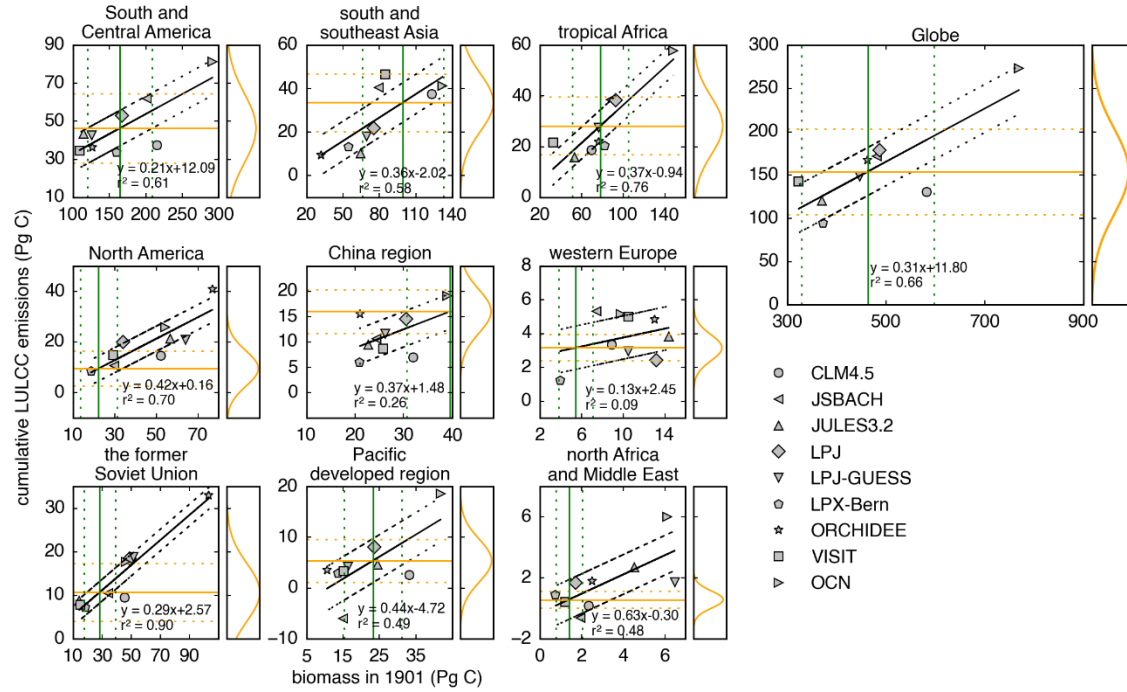

**Figure S4.** Relationship between biomass in 1901 and cumulative land-use and land-cover change (LULCC) emissions during 1901-2012 across the nine TRENDY v2 models. The black solid line is the linear regression line. The vertical green solid line indicates the reconstructed biomass in 1901 from [Carvalho et al. \(2014\)](#) using **Method-B** method (all the increase of cropland and pasture in HYDE v3.1 data proportionally from all natural vegetation types). The orange solid horizontal line indicates the cumulative LULCC emissions constrained by reconstructed biomass in 1901. Dashed lines represent 1- $\sigma$  uncertainties. The probability density function of the constrained cumulative LULCC emissions is shown on the right.

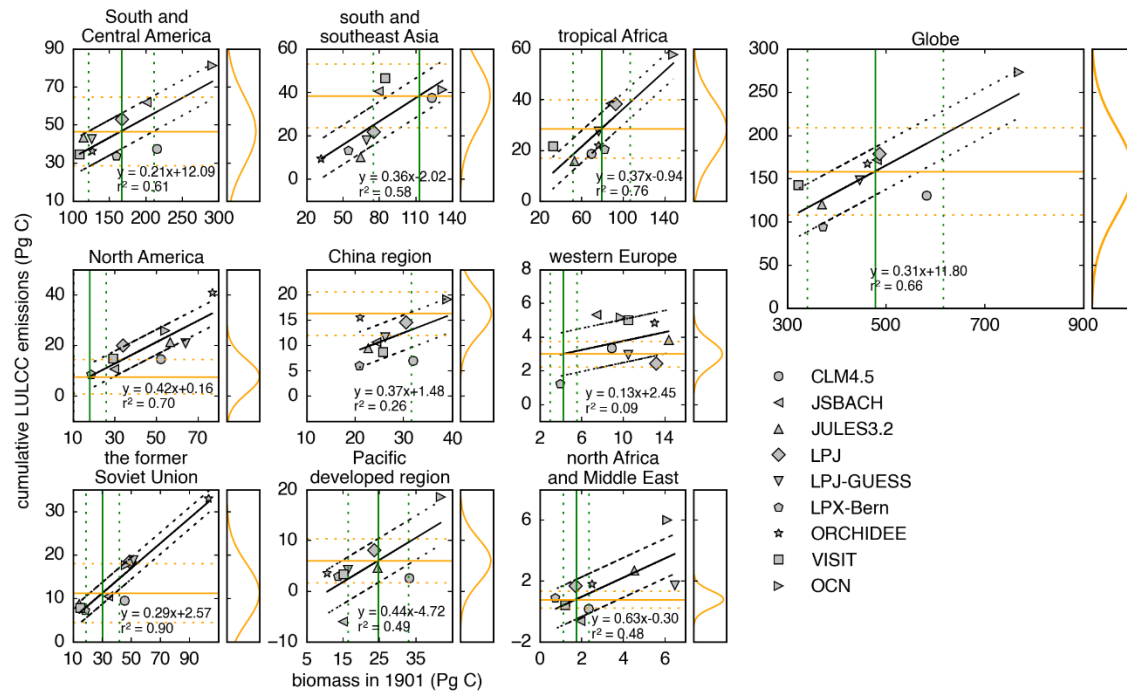

**Figure S5.** Relationship between biomass in 1901 and cumulative land-use and land-cover change (LULCC) emissions during 1901-2012 across the nine TRENDY v2 models. The black solid line is the linear regression line. The vertical green solid line indicates the reconstructed biomass in 1901 from [Carvalho et al. \(2014\)](#) using **Method-C** method (backward extrapolated map based on HYDE v3.1 data and meanwhile constrained by regional deforestation data). The orange solid horizontal line indicates the cumulative LULCC emissions constrained by reconstructed biomass in 1901. Dashed lines represent 1- $\sigma$  uncertainties. The probability density function of the constrained cumulative LULCC emissions is shown on the right.
